RESEARCH ARTICLE

**Connective-Tissue Growth Factor (CTGF/CCN2) Contributes to TGF- $\beta$ 1-Induced Lung Fibrosis**

Toyoshi Yanagihara<sup>1,2,6</sup>, Sy Giin Chong<sup>1,6</sup>, Mahsa Gholiof<sup>1</sup>, Kenneth E. Lipson<sup>3</sup>,  
Quan Zhou<sup>1</sup>, Ciaran Scallan<sup>1</sup>, Chandak Upagupta<sup>1</sup>,  
Jussi Tikkanen<sup>4</sup>, Shaf Keshavjee<sup>4,5</sup>, Kjetil Ask<sup>1</sup>, and Martin RJ Kolb<sup>1\*</sup>

<sup>1</sup> Firestone Institute for Respiratory Health, Research Institute at St Joseph's Healthcare,  
Department of Medicine, McMaster University, Hamilton, ON, Canada

<sup>2</sup> Research Institute for Diseases of the Chest, Graduate School of Medical Sciences,  
Kyushu University, Fukuoka, Japan

<sup>3</sup> FibroGen Inc., San Francisco, CA, USA

<sup>4</sup> Toronto Lung Transplant Program, University Health Network, Toronto, ON, Canada

<sup>5</sup> Division of Thoracic Surgery, Department of Surgery, University of Toronto, Toronto,  
ON, Canada.

<sup>6</sup> These authors equally contributed to this work.

**\* Corresponding author:**

Name: Martin RJ Kolb

Address: Firestone Institute for Respiratory Health, McMaster University

50 Charlton Ave. East, Hamilton, ON, L8N 4A6 Canada

E-mail: kolbm@mcmaster.ca

## 1 **Abstract**

2 Idiopathic pulmonary fibrosis (IPF) is a fatal lung disease characterized by progressive  
3 and excessive accumulation of myofibroblasts and extracellular matrix in the lung.  
4 Connective-tissue growth factor (CTGF) is known to exacerbate pulmonary fibrosis in  
5 radiation-induced lung fibrosis, and in this study, we show the upregulation of CTGF  
6 from a rat lung fibrosis model induced by adenovirus vector encoding active TGF- $\beta$ 1  
7 (AdTGF- $\beta$ 1), and also in patients with IPF. The expression of CTGF was upregulated in  
8 vascular smooth muscle cells cultured from fibrotic lungs on days 7 or 14 as well as  
9 endothelial cells sorted from fibrotic lungs on day 14 or 28 respectively. These findings  
10 suggest the role of different cells in maintaining the fibrotic phenotype during  
11 fibrogenesis. Treatment of fibroblasts with recombinant CTGF along with TGF- $\beta$   
12 increases pro-fibrotic markers in fibroblasts, confirming the synergistic effect of  
13 recombinant CTGF with TGF- $\beta$  in inducing pulmonary fibrosis. Also, fibrotic  
14 extracellular matrix upregulated the expression of CTGF, as compared to normal  
15 extracellular matrix, suggesting that not only profibrotic mediators but also a profibrotic  
16 environment contributes to fibrogenesis. We also showed that pamrevlumab, a CTGF  
17 inhibitory antibody, partially attenuates fibrosis in the model. These results suggest that  
18 pamrevlumab could be an option for the treatment of pulmonary fibrosis.

19

20

21

## 1 **Introduction**

2 Idiopathic pulmonary fibrosis (IPF) is a fatal progressive disease with an  
3 unknown etiology that is characterized by excessive accumulation of myofibroblasts  
4 and extracellular matrix in the lungs, and with a median survival of 3–5 years after  
5 diagnosis (1)(2). Currently, there are two available FDA-approved drugs for IPF:  
6 nintedanib and pirfenidone (3). These drugs are thought to inhibit pathways in the  
7 aberrant wound healing response and to slow disease progression, but fail to stop or  
8 reverse IPF progression. We therefore need to elucidate key pathways in IPF  
9 progression to effectively target and treat this fibrotic disease.

10 Connective-tissue growth factor (CTGF), also known as CCN2 (Cyr61 [cysteine-  
11 rich protein 61], CTGF [connective tissue growth factor] and NOV [nephroblastoma  
12 overexpressed gene]; and more recently coined, cellular communication network 2), is a  
13 secreted protein with a role in different cellular events, such as cell proliferation,  
14 differentiation, migration, skeletogenesis, angiogenesis, and wound healing (4)(5).  
15 CTGF expression is regulated by various growth factors and cytokines, including  
16 transforming growth factor (TGF- $\beta$ ) and bone morphogenetic protein (BMP). CTGF has  
17 a cysteine knot domain that mediates its interaction with cell surface and matrix heparan  
18 sulfate proteoglycans, and keeps it in the vicinity of the cells from which it is secreted,  
19 enabling it to act in an autocrine or paracrine manner. It has been suggested that CTGF  
20 plays a role in extracellular matrix (ECM) production due to its ability for mediating  
21 collagen deposition in wound healing. CTGF is also involved in many pathological  
22 conditions. CTGF leads to myofibroblast formation by transdifferentiating other cells,  
23 such as resident fibroblasts, and epithelial cells. CTGF also has a role in remodeling and  
24 deposition of ECM by activating myofibroblasts which leads to fibrosis and tissue  
25 remodelling. When vasculature undergoes tissue remodeling, it can lead to local

1 hypertension which itself increases CTGF expression. This creates a positive feedback  
2 loop that leads to more tissue remodeling. CTGF also increases the expression of  
3 different cytokines, including VEGF and TGF- $\beta$ , which in turn increase CTGF  
4 expression, creating more positive feedback loops as a result.

5 In this study, we showed upregulation of CTGF in lung tissues from patients with  
6 IPF, as well as in a rat lung fibrosis model induced by adenoviral vector encoding TGF-  
7  $\beta 1^{223/225}$  (originally named AdTGF- $\beta 1^{223/225}$ ; hereafter called AdTGF- $\beta 1$ ) harboring a  
8 mutation of cysteine to serine at positions 223 and 225, with the expressed TGF- $\beta 1$   
9 biologically active (6). This model has been shown to induce more intense, rapid and  
10 severe fibrotic reactions, with greater increases in hydroxyproline, than those reported  
11 in various bleomycin studies (7). Lung fibrosis begins on day 7 and persists until day 28.  
12 Less pronounced acute lung injury, particularly to the epithelium, and accompanying  
13 inflammation were also evident in this model, compared to the bleomycin model (7).  
14 We also showed that pamrevlumab, a CTGF inhibitory antibody, partially attenuates  
15 fibrosis in the model.

16

## 17 **Materials and Methods**

### 18 *Ethics approval and consent to participate*

19 All animal work was conducted under the guidelines from the Canadian Council on  
20 Animal Care and approved by the Animal Research Ethics Board of McMaster  
21 University under protocol #17-07-31. All procedures using human tissues were  
22 approved by the Hamilton Integrated Research Ethics Board (11-3559, 13-523-C).

23

### 24 *Human samples*

25 Control lung tissues were from patients undergoing a surgical procedure for cancer. IPF

1 lungs were from patients undergoing explant at Toronto Lung Transplant Programme.

2 The lung samples were about 1–2 cm in size.

3

#### 4 *Animal Experiments*

5 Pulmonary fibrosis was induced by an adenoviral gene vector encoding biologically

6 active TGF- $\beta$ 1 (AdTGF- $\beta$ 1). Female Sprague-Dawley rats (250–300 g; Charles River,

7 Wilmington, MA) received  $5.0 \times 10^8$  PFU of AdTGF- $\beta$ 1 by single intratracheal

8 instillation under isoflurane anesthesia on day 0. Control rats received an empty vector

9 construct (AddL). Pamrevlumab (FibroGen, 25 mg/kg) or isotype control antibody

10 (FibroGen, 25 mg/kg) was given intraperitoneally from day 10 to day 27 three days in a

11 week in a double-blinded manner. Rats were sacrificed on day 7, 14, or 28 and lung

12 tissue was harvested.

13

#### 14 *Antibodies and reagents*

15 Antibodies used were anti- $\alpha$ -smooth muscle actin ( $\alpha$ -SMA) (abcam, ab7817),

16 anti- $\alpha$ -tubulin (Cell signaling technology, #2144S), anti-CTGF (Santa Cruz, sc-365970),

17 anti-Collagen type I (Rockland, #600-401-103-0.1), anti-TGF- $\beta$  (Cell signaling

18 technology, #3709S), anti-Smad3 (Cell signaling technology, 9513S), anti-phospho-

19 Smad3 (pSmad3) (Cell signaling technology, #9520S), anti-Sm22 (abcam, ab14106),

20 anti-Vimentin (abcam, ab16700), anti-VWF (LS Bio, LS-C411685-100), anti-rabbit

21 HRP linked IgG (Cell Signaling Technology, #7074), Anti-mouse IgG HRP-linked

22 Antibody (Cell Signaling Technology, #7076). For fluorescence microscopy, we used

23 goat or donkey secondary antibody conjugated with Alexa Fluor-488 and Alexa Fluor-

24 594 (abcam) as secondary antibodies. Recombinant human CTGF was from FibroGen.

25 Recombinant human TGF- $\beta$ 1 (#240-B) was purchased from R&D systems.

26

1 *Cell preparation and culture*

2 Human normal lung fibroblasts (HLFs) (PCS-201-013) were purchased from ATCC and  
3 cultured in 10% Fetal Bovine Serum (FBS) and 1% pen-strep (Gibco, Life  
4 Technologies) in Dulbecco's modified Eagle Medium (DMEM) (Biowhittaker®  
5 Reagents, Lonza). For primary rat fibroblasts, single-cell suspensions were created by  
6 mincing and 1 hr digestion with 1 mg/ml of collagenase type I (Sigma-Aldrich, C0130-  
7 1G) and 20 µg/ml of DNase I (Sigma-Aldrich, 11284932001) of harvested rat lungs,  
8 then cells were cultured for 7 days or till confluency and used as primary fibroblasts.  
9 For primary rat vascular smooth muscle cells (VSMCs), central pulmonary arteries from  
10 AdDL or AdTGF-β1-treated lungs were carefully dissected and cut into < 1 mm pieces  
11 and cultured in 10% FBS and 1% pen-strep in DMEM in 6 well plates for 8 days.  
12 VSMCs were characterized by being positive for Sm22 (>95%) and negative for  
13 endothelial cell marker CD31 by immuno-staining. HLFs were used at passages  
14 between P2 and P6. Primary rat VSMCs were used at passage P1. All cells were  
15 incubated at 37°C, 5% CO<sub>2</sub>.

16

17 *Histology*

18 The left lobes of rat lungs were fixed by intratracheal instillation of 10% neutral-  
19 buffered formalin at a pressure of 20 cm H<sub>2</sub>O. Picture acquisition of Masson's  
20 Trichrome-stained (MT-stained) sections was performed using an automatic slide  
21 scanner microscope (Olympus VS 120-L).

22

23 *Ashcroft score*

24 Pulmonary fibrosis of Masson's Trichrome-stained lung sections was graded from 0  
25 (normal lung) to 8 (completely fibrotic lung), using a modified Ashcroft score (8).

26

1 *Immunofluorescence*

2 Immunostaining was performed on formalin-fixed rat lung tissue sections. Briefly,  
3 following deparaffinization and saturation of nonspecific sites with 10% horse  
4 serum/PBS for 30 min, lung sections were incubated with primary antibodies overnight  
5 in a humidified chamber at 4°C. Conjugated secondary antibodies were used at a  
6 dilution of 1:500. Slides were mounted in Prolong-gold with DAPI (ProLong® Gold  
7 antifade reagent with DAPI, Life technologies, P36931).

8

9 *Western blotting*

10 Crushed lungs were homogenized using a mechanical homogenizer (Omni International,  
11 Waterbury CT) or cultured cells were lysed in 1× lysis buffer (NEB, #9803S)  
12 supplemented with complete protease inhibitors (Roche) and the collected supernatant  
13 was used for western blotting. Total proteins from lung homogenate (30–60 µg) or cells  
14 (20 µg) were separated on a 6–12% SDS Polyacrylamide Electrophoresis gels based on  
15 the molecular weight. Proteins were transferred to a PVDF membrane (Bio-Rad  
16 Laboratories) using a wet transfer apparatus and blocked at room temperature for 30  
17 min using 5% skim milk. Protein detection was performed using Clarity™ Western  
18 ECL Substrate (Bio-Rad Laboratories) and read in a ChemiDoc XRS Imaging System  
19 (Bio-Rad Laboratories). The signals were measured using ImageJ public-domain  
20 software.

21

22 *Flow cytometry sorting*

23 Enzymatically digested rat lung was treated with ACK lysis buffer to eliminate  
24 erythrocytes and washed with PBS, followed by incubation with anti-Fcγ III/II receptor.  
25 Anti-rat CD31-viobright FITC (Miltenyi, 130-105-880), anti-rat CD45-APC/Cy7 (BD  
26 Biosciences, 561586), and 7-Aminoactinomycin D (7-AAD) (BD, 559525) were used.

1 Flow cytometry sorting was done on MoFlo XDP (Beckman Coulter).

2

### 3 *Isolation of mRNA and gene expression*

4 Total RNA was extracted from frozen lung tissue or cultured cells with TRIzol®  
5 reagent (Thermo fisher scientific, 15596026) according to the manufacturer's  
6 recommendations. For sorted ECs, total RNA was extracted using RNeasy Plus Micro  
7 Kit (Qiagen, 74034). Total RNA was reverse transcribed using qScript cDNA SuperMix  
8 (Quanta Bioscience, 95048-025, Gaithersburg, MD). The cDNA was amplified using a  
9 Fast 7500 real-time PCR system (AB Applied Biosystems) using TaqMan® Universal  
10 PCR Master Mix and predesigned primer pairs (Thermo Fisher Scientific) for rat *Gapdh*  
11 (Rn01775763\_g1), rat *Ctgf* (Rn01537279\_g1), human *ACTA2* (Hs00426835\_g1),  
12 human *COL1A1* (Hs00164004\_m1), human *CTGF* (Hs00170014\_m1), human *TGFBR1*  
13 (Hs00610320\_m1), and human *GAPDH* (Hs02786624\_g1).

14

### 15 *Decellularization and Recellularization of Rat Lungs*

16 Lungs were harvested on day 28 after AdTGF-β1 or AdDL administration.  
17 Decellularization was performed through manual lung perfusion (10 ml each time) and  
18 incubation with 50 ml of: TritonX (1%; overnight), Sodium Deoxycholate (2%;  
19 overnight), NaCl (1 M; 1 hr), and stored in PBS supplemented with Penicillin  
20 Streptomycin (1%; max 3 months). Lungs were washed with sterile H<sub>2</sub>O between each  
21 solution during decellularization to ensure there was no mixing of wash solutions. Left  
22 lobe recellularization was performed by first tying off the right lobes leaving only the  
23 left lobe open. The left lobe was perfused with 5 ml of fibroblasts (1x10<sup>6</sup> cells/ml) in  
24 2% low melting agarose. Lungs were briefly left to solidify at room temperature and the  
25 left lobe was sectioned into horizontal slices of ~3 cm and immersed in 10% FBS and  
26 1% pen-strep in DMEM and incubated at 37°C, 5% CO<sub>2</sub> for 1 and 7 days.



1

## 2 *Data mining of single-cell RNA sequencing on human lungs*

3 Scatter plot with bar of CTGF expression across different cells in human lungs from  
4 healthy subjects (n=29) and patients with IPF (n=32) by single cell RNA sequencing.  
5 The data were generated from <http://ipfcellatlas.com/> (9).

6

## 7 *Statistical Analysis*

8 The Student's two-tailed unpaired t-test was used to compare two groups. Statistical  
9 analysis between multiple groups with one control group was performed by one-way  
10 analysis of variance (ANOVA) followed by Dunnett's multiple comparison test with the  
11 use of GraphPad Prism 8 (GraphPad Software Inc.). A *p*-value of less than 0.05 was  
12 considered significant.

13

## 14 **Results**

### 15 **CTGF was upregulated in lungs from patients with IPF.**

16 The expression of CTGF in lungs from patients with IPF was first examined by  
17 immunofluorescence. As expected, CTGF expression was elevated in the IPF lung and  
18 co-localized with Vimentin positive cells (fibroblasts) and VWF positive cells (ECs)  
19 (Figure 1A). Western blots of explanted lung lysates showed a tendency for increased  
20 CTGF expression in patients with IPF compared to control lungs ( $1.43 \pm 0.75$  [mean  $\pm$   
21 SD], *p* = 0.09), that did not achieve statistical significance due to the high variability in  
22 the IPF lungs (Figure 1B, 1C). We classified IPF patients into subgroups: IPF + no  
23 treatment, IPF + pirfenidone, and IPF + nintedanib. Treatment with pirfenidone or  
24 nintedanib had a tendency to suppress CTGF expression in IPF lungs compared to IPF  
25 without treatment, again though not significant (IPF:  $1.62 \pm 0.76$ , IPF + pirfenidone:

1 1.38±0.83, IPF + nintedanib: 1.36±0.56. [mean ± SD])(Figure 1D).

2 Recent advances in single-cell RNA sequencing (scRNA-seq) have unveiled cell-  
3 specific gene expression in the lung from healthy subjects (n=14) and patients with IPF  
4 (n=26) (9). Mining of the scRNA-seq data showed *CTGF* was expressed in several cell  
5 types, including fibroblasts, myofibroblasts, smooth muscle cells, vascular endothelial  
6 cells, ciliated cells, basal cells, type 1 alveolar epithelial cells, mesothelial cells, and  
7 lymphatic cells (Figure 1E).

8

### 9 **CTGF was upregulated in AdTGF-β1-induced lung fibrosis in rats.**

10 To investigate the association CTGF with pulmonary fibrosis in a rodent model,  
11 female Sprague-Dawley rats were exposed to AdTGF-β1 by a single intratracheal  
12 instillation on day 0. Control rats received an empty vector construct (AdDL).  
13 Immunofluorescence (IF) staining of lung sections showed that expression of CTGF  
14 was upregulated in the AdTGF-β1 rats, as shown in Figure 2A. This result was  
15 confirmed with Western Blot analysis for CTGF in whole lung lysates of AdDL and  
16 AdTGF-β1 rats (Figure 2B, 2C). It is well known that fibroblasts express CTGF (10),  
17 which was also supported by scRNA-seq data from human lungs (Figure 1C). In  
18 addition to fibroblasts, vascular cells also appeared to express CTGF, including  
19 endothelial cells and Sm22-positive vascular smooth muscle cells (Figure 2A).

20 VSMCs were isolated from the pulmonary arteries in lungs of AdDL (nVSMCs)  
21 and AdTGF-β1 (fVSMCs) rats on 7, 14 and 28 days after infection and cultured. CTGF  
22 expression was upregulated in fVSMCs isolated from lungs on days 7 or 14 but not on  
23 day 28 (Figure 2D, 2E), suggesting VSMCs contribute to CTGF expression in the early  
24 stages of fibrosis. On the other hand, increased CTGF expression was observed in  
25 sorted endothelial cells (ECs) isolated from AdTGF-β1 rats on days 14 and 28,  
26 suggesting ECs contribute to CTGF expression in the middle to late stages of fibrosis

1 (Figure 2F).

2

3 **Recombinant CTGF synergistically induced pro-fibrotic markers in fibroblasts**  
4 **along with TGF- $\beta$ .**

5 Next, we sought to examine the pro-fibrotic effect of CTGF on fibroblasts. Human  
6 lung fibroblasts were treated with recombinant CTGF for 24 hours under serum free  
7 condition. The mRNA expression of pro-fibrotic markers such as *ACTA2* and *COL1A1*  
8 were examined. Although the mRNA expression of *ACTA2* and *COL1A1* were shown to  
9 be slightly increased as they were treated with increasing concentration of recombinant  
10 CTGF (Figure 3A), high concentrations of recombinant CTGF were required (over 1~3  
11  $\mu\text{g/ml}$ ) to observe significant effects. To determine whether recombinant CTGF works  
12 synergistically with TGF- $\beta$ , expression of the profibrotic markers was also examined  
13 after the human lung fibroblasts were treated with recombinant TGF- $\beta$  with and without  
14 recombinant CTGF for 24 hours. The expression of *ACTA2*, *COL1A1*, and *CTGF* was  
15 greatly elevated when human lung fibroblasts were treated with recombinant TGF- $\beta$  in  
16 combination with low concentrations of recombinant CTGF that induced no *ACTA2*  
17 expression on their own (Figure 3B). This observation indicates a synergistic effect  
18 between these two factors and suggests a substantial role for CTGF in mediating  
19 fibrosis.

20

21 **The regulatory mechanism of CTGF in the cells.**

22 To explore regulatory mechanisms of CTGF expression in the fibroblasts, cells  
23 were cultured under different conditions *in vitro* and *ex vivo*. To determine the TGF- $\beta$   
24 dose-response, human lung fibroblasts were stimulated with different concentrations of  
25 recombinant TGF- $\beta$  for 24 hours under serum free condition. The expression of *CTGF*  
26 mRNA increased with increasing concentrations of TGF- $\beta$  stimulation (Figure 4A).

1       The effect of matrix stiffness on CTGF expression in human lung fibroblasts was  
2 evaluated by culturing the cells on matrices of different stiffness (1 kPa, 50 kPa, and  
3 tissue culture plate [TCP]). The physiological stiffness of lungs ranges from 0.2–2 kPa,  
4 whereas pathological stiffness in the fibrotic lung ranges from 2–35 kPa (11)(12).  
5 Tissue culture plastic represents an extremely stiff matrix that is similar to tendon or  
6 bone, in the  $10^6$  kPa range (13). A physiological stiffness is reported to keep lung  
7 fibroblasts in a quiescent state, whereas a pathological stiffness as in the fibrotic lungs  
8 is reported to induce a pro-fibrogenic phenotype with high proliferation and ECM  
9 synthesis rates (11). Within 24 hour of plating human lung fibroblasts on TCP, the  
10 expression of *ACTA2* mRNA was strongly elevated (Figure 4B). It was also elevated at  
11 24 hours in cells on the 50 kPa plates, relative to cells plated on the soft matrix. By 72  
12 hr, the expression of *ACTA2* mRNA on the stiffer matrices was lower than at 24 hours,  
13 but was still significantly elevated relative to that in cells on the soft matrix. The  
14 expression of *CTGF* mRNA was also induced in cells on the stiff plates, but with a  
15 somewhat different time course. At 24 hours after plating, *CTGF* mRNA was only  
16 significantly elevated on TCP. However, by 72 hr, *CTGF* mRNA was significantly  
17 greater in the fibroblasts plated on the 50 kPa matrix as well (5.5 times on 50 kPa and  
18 10.5 times on TCP compared to on 1 kPa for 72 hrs) (Figure 4B). These data  
19 demonstrate that the stiffness surrounding the cells regulates CTGF expression.

20       To further investigate the effect of a 3D environment on CTGF expression, primary  
21 rat fibroblasts were exposed to normal or fibrotic lung scaffolds. Rat lungs were  
22 decellularized at 28 days after instillation of AdDL or AdTGF- $\beta$ 1 to obtain normal and  
23 fibrotic lung scaffolds, respectively. The lung scaffolds were then recellularized with  
24 primary rat fibroblasts isolated from normal and fibrotic lungs (Figure 4C). Post  
25 recellularization on day 1 and day 7, expression of *Ctgf* mRNA was examined. *Ctgf*  
26 mRNA expression was elevated in normal fibroblasts in a fibrotic scaffold, as compared

1 to normal fibroblasts in a normal scaffold (Figure 4D). Interestingly, fibrotic fibroblasts  
2 in a normal scaffold exhibited reduced *Ctgf* mRNA expression (about 45% less) than  
3 that in fibrotic scaffolds at both time points. This observation indicates the plasticity of  
4 fibrotic fibroblasts responds to the microenvironment, and illustrates the importance of  
5 ECM in fibrogenesis (Figure 4D).

6

### 7 **Pamrevlumab attenuated TGF- $\beta$ 1-induced lung fibrosis in rats**

8 In order to evaluate the importance of CTGF in lung fibrosis induced by TGF- $\beta$ ,  
9 AdTGF- $\beta$ 1 rats were therapeutically administered the anti-CTGF antibody,  
10 pamrevlumab, or placebo human antibodies. While Masson's trichrome staining of lung  
11 sections on day 28 after instillation of AdTGF- $\beta$ 1 suggested that administration of  
12 pamrevlumab resulted in less lung remodeling and fibrosis, there was not a statistically  
13 significant reduction in the Ashcroft score on day 28 (Figure 5A). IF staining of lung  
14 sections showed that pamrevlumab administration reduced the expression of CTGF in  
15 Vimentin-positive cells (fibroblasts) (Figure 5B). Western Blot analyses were used to  
16 confirm the effect of pamrevlumab on CTGF expression and to evaluate its effect on the  
17 expression of other markers of fibrogenesis and TGF- $\beta$  signaling: Collagen type 1,  $\alpha$ -  
18 SMA, TGF- $\beta$ , phospho-Smad3 (pSmad3), Smad3 and  $\alpha$ -tubulin (Figure 5C).  
19 Pamrevlumab treatment resulted in a statistically significant reduction in the expression  
20 of CTGF, which is concordant with IF staining. Pamrevlumab also significantly  
21 decreased the abundance of  $\alpha$ -SMA. There was a trend for reduced TGF- $\beta$  in the lungs  
22 of pamrevlumab-treated rats, which was not statistically significant. However, canonical  
23 TGF- $\beta$  signaling, as indicated by the pSmad3/Smad3 ratio, was significantly decreased  
24 in rats treated with pamrevlumab (Figure 5D).

25

## 1 **Discussion**

2 CTGF is a key mediator of tissue remodeling and fibrosis (14). CTGF activates  
3 myofibroblasts to produce pro-fibrotic extracellular matrix proteins leading to tissue  
4 remodeling and fibrosis (14). CTGF was previously reported to be elevated in the lungs  
5 of IPF patients and to be predominantly expressed in myofibroblasts and type 2 alveolar  
6 epithelial cells (15). In the present study, we observed a trend for elevated CTGF in  
7 lungs of IPF patients, which did not reach statistical significance due to variability. At  
8 the present time, it is unclear if the variability of CTGF expression observed in IPF  
9 lungs represents heterogeneity of the composition of the small pieces of lung examined,  
10 or whether it might depend on the epigenetic or genetic background of the patients, as  
11 previously reported in patients with systemic sclerosis (16). If CTGF expression in IPF  
12 patients is regulated by epigenetics or genetics, such information could assist with  
13 prescription of personalized therapy for treatment of IPF using an agent such as  
14 pamrevlumab. However, at the present time, there are no data to support this hypothesis.

15 Data from mining of single cell sequencing of normal and IPF lungs has greatly  
16 expanded the known number and types of cells in the lung that express CTGF. Many of  
17 these cells, such as fibroblasts, myofibroblasts, endothelial cells and smooth muscle  
18 cells, would have been predicted from cells known to express CTGF. Others, however,  
19 such as ciliated, club and goblet cells, appear to be novel. It is also interesting that  
20 CTGF expression in some of the highest expressing cells, such as myofibroblasts and  
21 venous endothelial cells, are very similar in healthy and IPF lungs. Only a few cell  
22 types exhibited substantial differences in CTGF expression between healthy and IPF  
23 lungs, including ciliated cells and fibroblasts, which both exhibited higher CTGF  
24 expression in IPF, and smooth muscle cells, which exhibited lower CTGF expression in  
25 IPF lung. How these changes relate to IPF pathophysiology remain to be elucidated.

1 CTGF was upregulated in multiple cell types with different time courses in the rat  
2 AdTGF- $\beta$ 1-induced lung fibrosis model. VSMC expressed elevated CTGF earlier than  
3 endothelial cells, which upregulated CTGF in the middle to later stages of fibrosis.  
4 Endothelial cell expression of CTGF is necessary for development of PH secondary to  
5 chronic hypoxia, and is a potential mechanism in the regulation of Rho family GTPase,  
6 Cdc42 (17). Our results suggest that altered vasculature cells actively contribute to  
7 pulmonary fibrosis through CTGF in cooperation with fibrotic fibroblasts. We speculate  
8 that interaction between vasculature cells and fibroblasts determine fibrotic features  
9 during the pathogenesis of IPF. Uncoordinated and uncontrolled release of CTGF by  
10 fibrotic cells may exaggerate abnormal tissue and vascular repair and subsequent  
11 formation of pulmonary fibrosis and pulmonary hypertension.

12 CTGF is an identified coordinator of vascular repair and vascular remodelling,  
13 which is an essential requirement for life as a complex organism (18). A variety of cells,  
14 from bone marrow-derived endothelial progenitor cells to peripheral circulating  
15 endothelial cells, serve as remote progenitors that can participate with locally  
16 proliferating cells in the formation of new blood vessels in response to a wide array of  
17 proangiogenic factors (18). Ischemia/hypoxia is a primary inducer of many of these  
18 factors, as are other stress and injury response pathways (18). CTGF is a hypoxia  
19 inducible protein (19)(20) with multiple cellular targets (18). Levels of plasma CTGF  
20 were also reported to be a potential biomarker in IPF, where CTGF levels were reported  
21 to be significantly elevated in IPF patients compared with non-IPF and healthy  
22 volunteers, and to correlate with loss of lung function (21).

23 Several studies have confirmed the cooperative effects of TGF- $\beta$  and CTGF in  
24 fibrosis (22–26). CTGF has been reported to bind to TGF- $\beta$  through the N-terminal von  
25 Willebrand factor domain, and this has been suggested to augment TGF- $\beta$  activity,  
26 potentiating fibrosis (21). Our previous study, which showed that transient CTGF

1 overexpression by itself is not sufficient to cause lung fibrosis, also strengthens the  
2 importance of the cooperative effects of TGF- $\beta$  and CTGF (27).

3 Our data demonstrate the crucial role of the cellular environment for regulation of  
4 CTGF expression in 2D and 3D settings. Matrix stiffness influences the subcellular  
5 location of Transcriptional coactivator with PDZ-binding motif (TAZ) (25). Matrix  
6 stiffness facilitates F-actin organization, mechanotransduction, and activation of TAZ  
7 (25). TAZ in turn forms complexes with Smad2/3 that translocate into the nucleus and  
8 regulate target gene transcription following stimulation with TGF- $\beta$  stimulation (25).  
9 These cellular responses could mediate the increased expression of CTGF and fibrotic  
10 markers in fibroblasts cultured on matrices of increased stiffness.

11 In the rat AdTGF- $\beta$ 1-induced lung fibrosis model, pamrevlumab treatment  
12 significantly decreased markers of fibrogenesis such as  $\alpha$ -SMA and CTGF.  
13 Pamrevlumab also significantly decreased canonical TGF- $\beta$  signaling, as indicated by  
14 reduced pSmad3. Since CTGF has been reported to directly affect non-canonical, but  
15 not canonical TGF- $\beta$  signaling (28), the observation of pamrevlumab effects on  
16 canonical TGF- $\beta$  signaling is likely the result of the decreased expression of TGF- $\beta$  in  
17 this TGF- $\beta$ -driven model. While visual inspection of Masson's trichrome-stained  
18 sections suggested that pamrevlumab attenuated pulmonary remodeling and fibrosis,  
19 Ashcroft scoring was not able to confirm a statistically significant reduction of fibrosis.  
20 The rapid time course of this rodent model, and the short duration of treatment may  
21 have contributed to the limited response observed for pamrevlumab.

22 The results of a randomized, double-blind, placebo-controlled phase 2 clinical trial  
23 testing pamrevlumab in IPF patients (PRAISE) was recently reported (29). This trial,  
24 which was performed at 39 medical centres in seven countries (Australia, Bulgaria,  
25 Canada, India, New Zealand, South Africa and the USA), demonstrated that  
26 pamrevlumab reduced the decline in percentage predicted forced vital capacity by



1 60.3% at week 48 (mean change from baseline  $-2.9\%$  with Pamrevlumab vs  $-7.2\%$  with  
2 placebo) (29). The proportion of patients with disease progression was found to be  
3 lower in patients treated with pamrevlumab than in the placebo group at week 48 with  
4 good tolerability of pamrevlumab and a safety profile similar to that of placebo (29).

5 CTGF is upregulated in other fibrosing diseases/models: radiation-induced  
6 pulmonary fibrosis mouse model (30)(31), fibroblasts from systemic sclerosis patients  
7 (32)(33), bronchoalveolar lavage cells from patients with chronic sarcoidosis (34). A  
8 polymorphism in the CTGF promoter region has been reported to be associated with  
9 systemic sclerosis (16). Homozygosity for the G allele in the promoter of the *CTGF*  
10 gene (rs6918698) carries an increased risk of scleroderma and, in particular, an  
11 increased risk of interstitial lung fibrosis among patients with this disorder (16). These  
12 results suggest that upregulation of CTGF is a common feature in the pathogenesis of  
13 fibrosis, and therefore pamrevlumab could be an option for the treatment of pulmonary  
14 fibrosis.

## 15 **Acknowledgements**

16 We thank Ms. Fuqin Duan for her technical assistance.

## 17 **Conflicts of interest**

18 T. Yanagihara was funded by the Uehara Memorial Foundation Research Fellowship  
19 and Mitacs Canada, and the research institute of St Joseph's Hospital, Hamilton, ON,  
20 Canada (Post-doctoral Fellowship Award). K. Ask reports grants and personal fees from  
21 Boehringer Ingelheim, grants from Canadian Pulmonary Fibrosis Foundation,  
22 Synairgen, Alkermes, GlaxoSmithKline, Pharmaxis, Unity, Avalyn, Canadian  
23 Institutes of Health Research, Ceapro, Pieris, outside the submitted work. M. Kolb  
24 reports grants from the Canadian Institute for Health Research and grants/ personal fees  
25 from Roche, Boehringer Ingelheim, Prometic, Respivot, Alkermes, and Pharmaxis and

- 1 personal fees from Genoa. K.E. Lipson is an employee and shareholder of FibroGen,
- 2 Inc. J. Tikkanen reports personal fees from CSL Behring, outside the submitted work.
- 3 S.G. Chong , M. Gholiof, Q. Zhou, C. Scallan, C. Upagupta, and S. Keshavjee report no
- 4 conflict of interest.

5  
6

## 1 Figure legends

### 2 Figure 1. CTGF expression in the human lung.

3 (A) Immunofluorescence staining of Vimentin, VWF, CTGF, and DAPI on the lung  
 4 sections from a control or a patient with idiopathic pulmonary fibrosis (IPF). (B)  
 5 Western blot analysis and quantification (C) for CTGF and  $\alpha$ Tubulin in explanted lung  
 6 lysates of patients with IPF. (D) IPF patients were sub-grouped into IPF+no treatment,  
 7 IPF+PFD, and IPF+NID. Ctrl: n=9, IPF+no treatment: n=11, IPF+PFD: n=23,  
 8 IPF+NID: n=9. PFD; pirfenidone, NID; nintedanib. Data are expressed as mean  $\pm$  SD.  
 9 The amount of CTGF in untreated IPF lungs were compared to that of control,  
 10 IPF+PFD, and IPF+NID by ANOVA with Dunnet's multiple comparison test. (E)  
 11 Scatter plot with bar of CTGF expression across different cells in human lungs from  
 12 healthy subjects (n=29) and patients with IPF (n=32) by single cell RNA sequencing.  
 13 The data were generated from <http://ipfcellatlas.com/>.

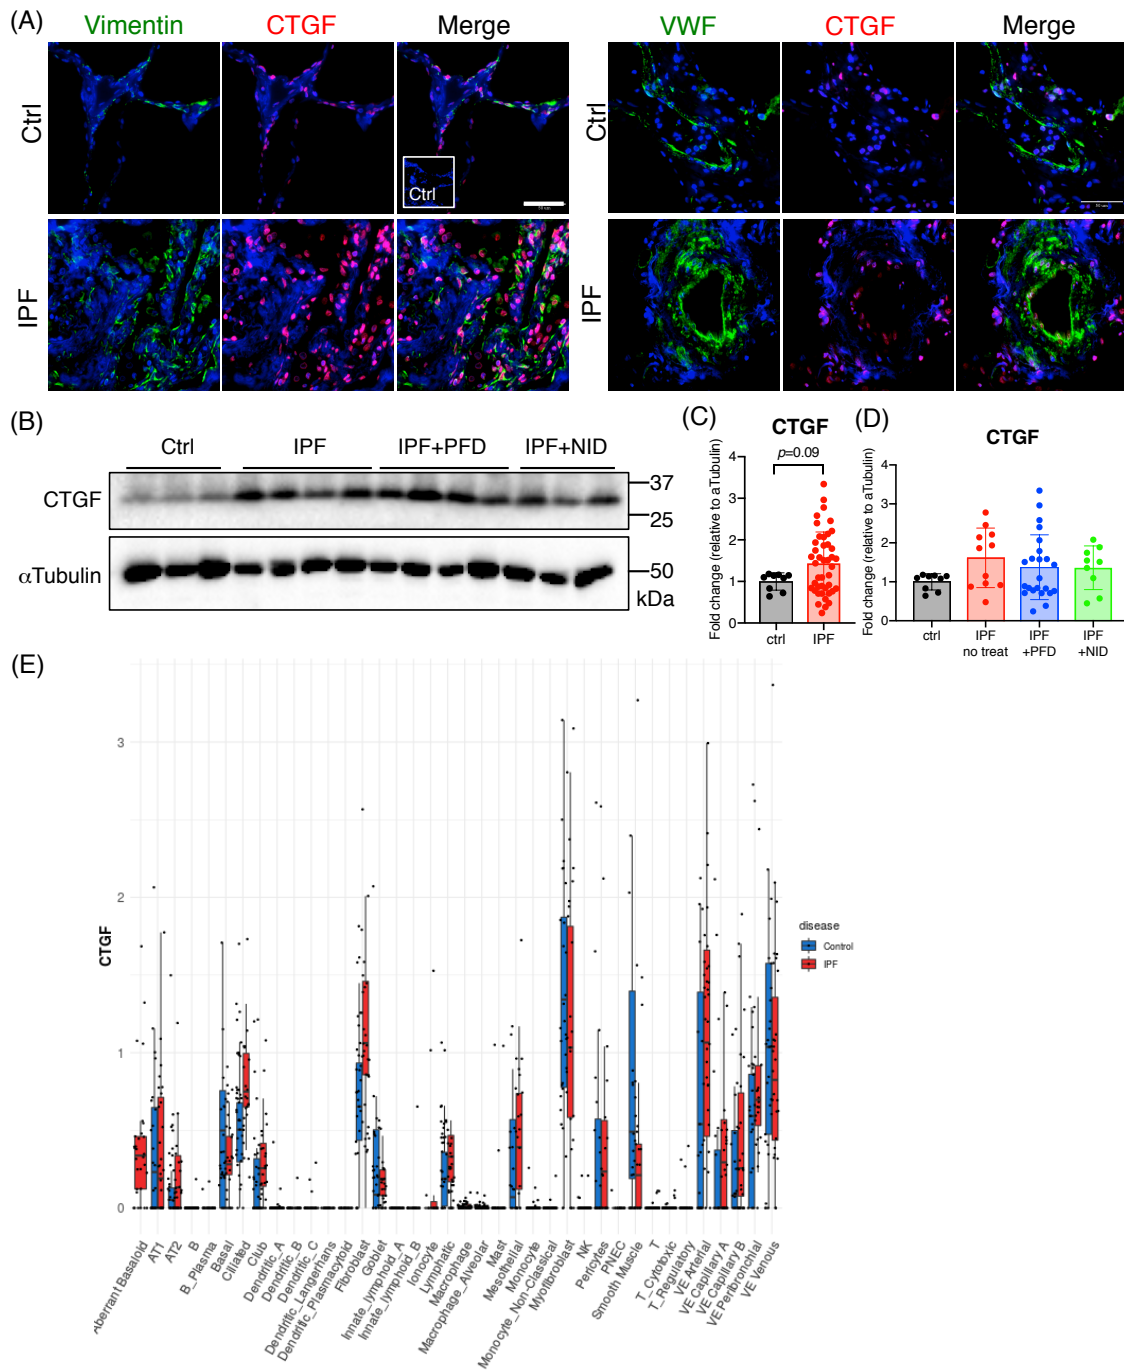

1 **Figure 2. CTGF was upregulated in AdTGF- $\beta$ 1-induced lung fibrosis in rats.**  
 2 (A) Immunofluorescence staining of Sm22, CTGF, and DAPI on the lung sections from  
 3 rats treated with AdDL and AdTGF- $\beta$ 1 on day 7. (B) Western blot analysis and  
 4 quantification (C) for CTGF and  $\alpha$ Tubulin in whole lung lysates of AdDL and AdTGF-  
 5  $\beta$ 1. Representative images are on day 7. (D) Western blot analysis and quantification  
 6 (E) for CTGF and  $\alpha$ Tubulin in the cultured vascular smooth muscle cells (VSMCs)  
 7 from AdDL (nVSMCs) and AdTGF- $\beta$ 1 (fVSMCs) on days 7, 14, and 28 ( $n=3$ ). (F)  
 8 mRNA expression of *Ctgf* in the sorted endothelial cells (ECs) from AdDL or AdTGF-  
 9  $\beta$ 1-treated rat lungs ( $n=4$  for each group). Data are expressed as mean  $\pm$  SEM. \*\* $p$  <  
 10 0.01, \* $p$  < 0.05.

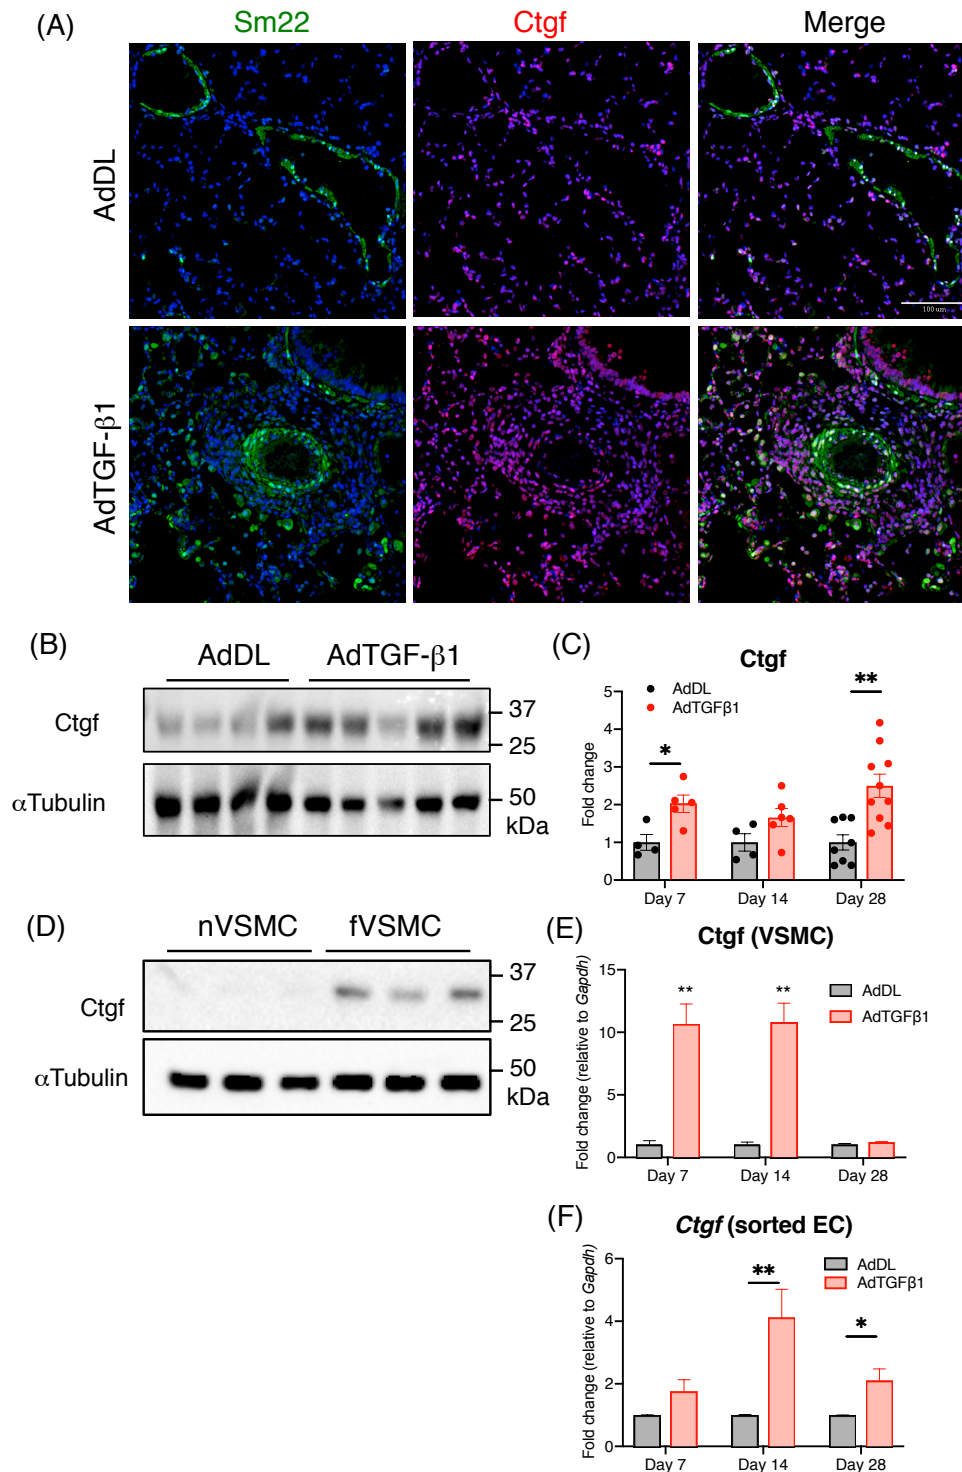

1 **Figure 3. Recombinant CTGF synergistically induced pro-fibrotic markers in**  
 2 **fibroblasts along with TGF- $\beta$ .**  
 3 (A) mRNA expression of *ACTA2* and *COL1A1* in human lung fibroblasts treated with  
 4 recombinant CTGF for 24 hrs under serum free condition. Levels of gene expression  
 5 were compared with that in fibroblasts without recombinant CTGF treatment. (B)  
 6 mRNA expression of *ACTA2*, *COL1A1*, *CTGF*, *TGFBR* in human fibroblasts treated  
 7 with recombinant TGF- $\beta$  with/without recombinant CTGF for 24 hrs. Levels of gene  
 8 expression were compared with that in fibroblasts treated with recombinant TGF- $\beta$   
 9 without recombinant CTGF. \*\* $p < 0.01$ , \* $p < 0.05$ .  
 10

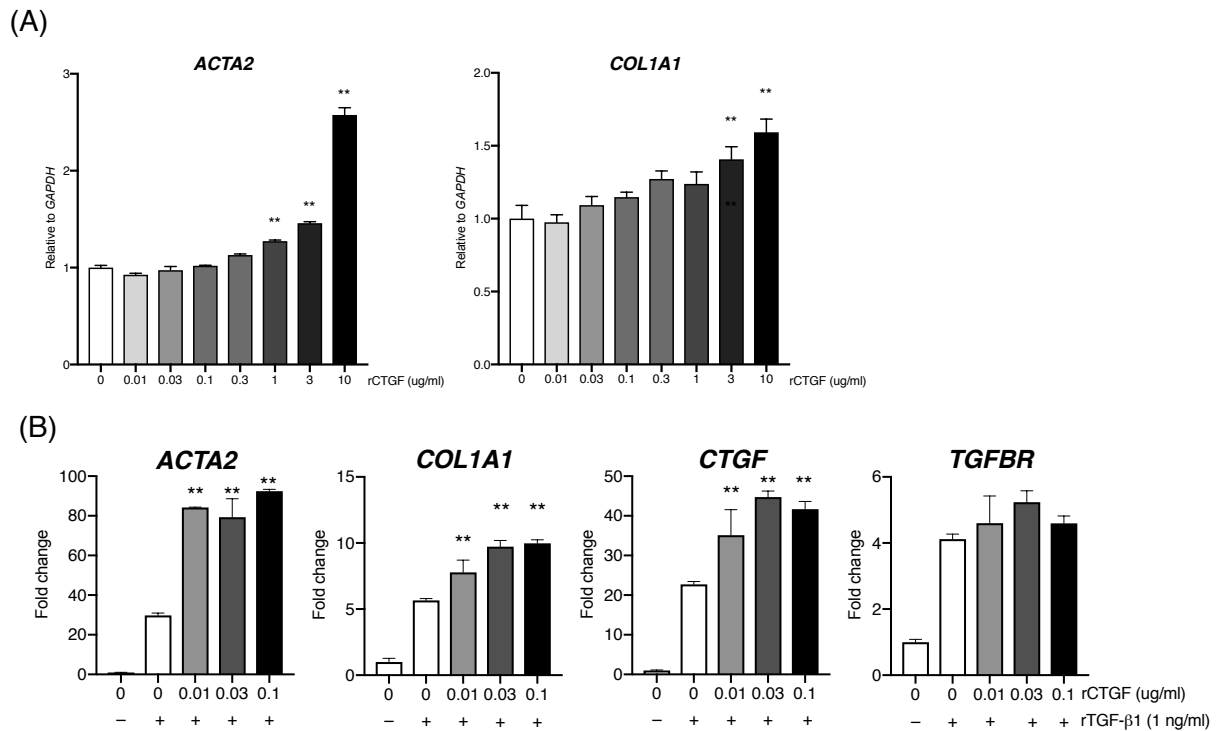

11  
 12

1 **Figure 4. The regulatory mechanism of CTGF in the cells.**  
 2 (A) mRNA expression of *CTGF* in human lung fibroblasts treated with recombinant  
 3 TGF- $\beta$  for 24 hrs under serum free condition. (B) mRNA expression of *ACTA2* and  
 4 *CTGF* in human lung fibroblasts cultured on different stiffness plates. (C) Schematic  
 5 images of recellularization with rat fibroblasts in a rat decellularized lung and (D)  
 6 mRNA expression of *Ctgf* in the recellularized lung at indicated time point. **\*\*** $p < 0.01$ ,  
 7 **\*** $p < 0.05$ .

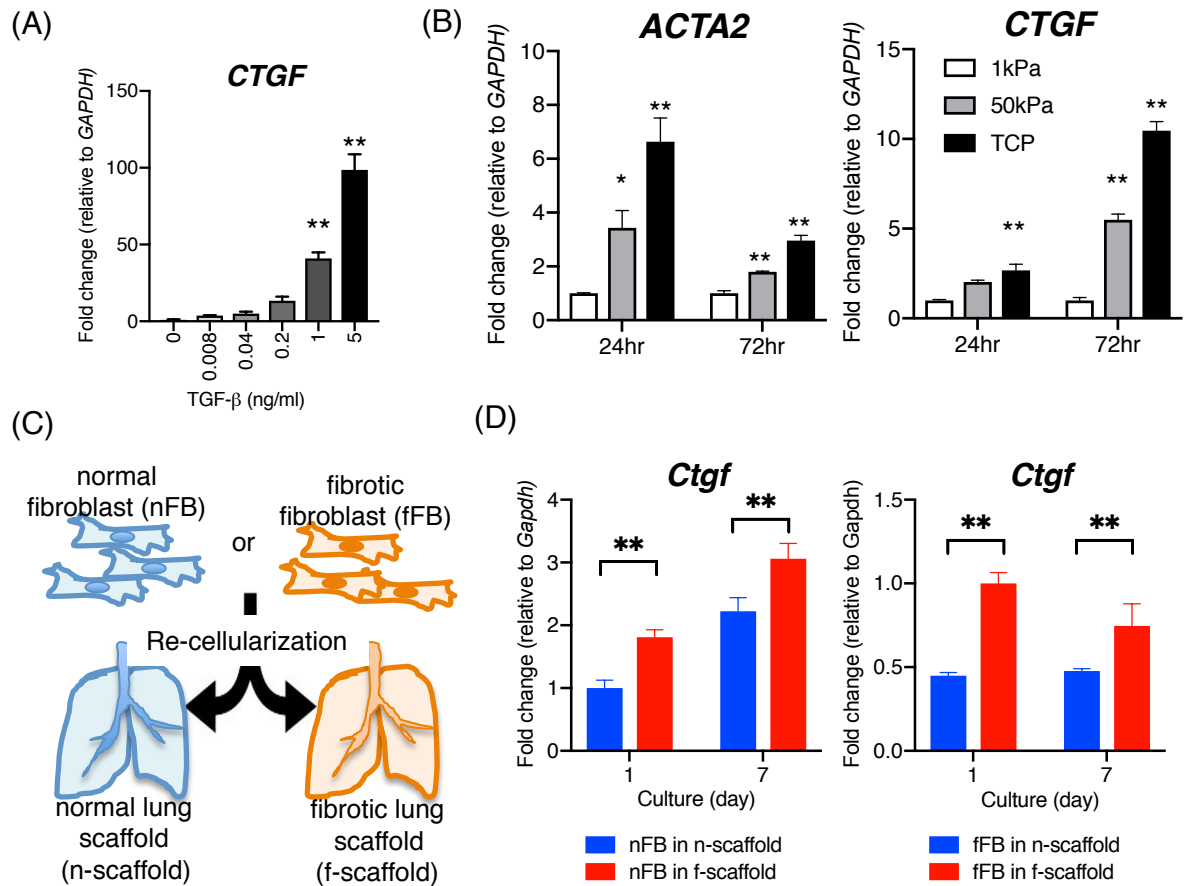

8  
 9  
 10

1 **Figure 5. Pamrevlumab partially attenuated TGF- $\beta$ 1-induced lung fibrosis in rats.**  
 2 (A) Representative lung sections stained by Masson's trichrome imaged by Slide  
 3 Scanner and Ashcroft scoring from AdDL, AdTGF- $\beta$ 1+isotype control IgG (iso Ab),  
 4 and AdTGF- $\beta$ 1+ pamrevlumab on day 28. (B) Immunofluorescence staining of  
 5 Vimentin, CTGF, and DAPI on the lung sections from rats treated with AdDL,  
 6 AdTGF- $\beta$ 1+iso Ab, and AdTGF- $\beta$ 1+ pamrevlumab on day 28. (C) Western blot  
 7 analysis of Collagen type I,  $\alpha$ SMA, CTGF, TGF- $\beta$ , phospho-Smad3 (pSmad3), Smad3,  
 8 and  $\alpha$ Tubulin in whole lung lysates of AdDL, AdTGF- $\beta$ 1+iso Ab, and AdTGF-  
 9  $\beta$ 1+pamrevlumab on day 28.  $\alpha$ Tubulin was used as a loading control. AdDL;  $n=8$ ,  
 10 AdTGF- $\beta$ 1+iso Ab;  $n=10$ , AdTGF- $\beta$ 1+pamrevlumab:  $n=10$ . Data are expressed as  
 11 mean  $\pm$  SEM. \*\* $p < 0.01$ , \* $p < 0.05$ .

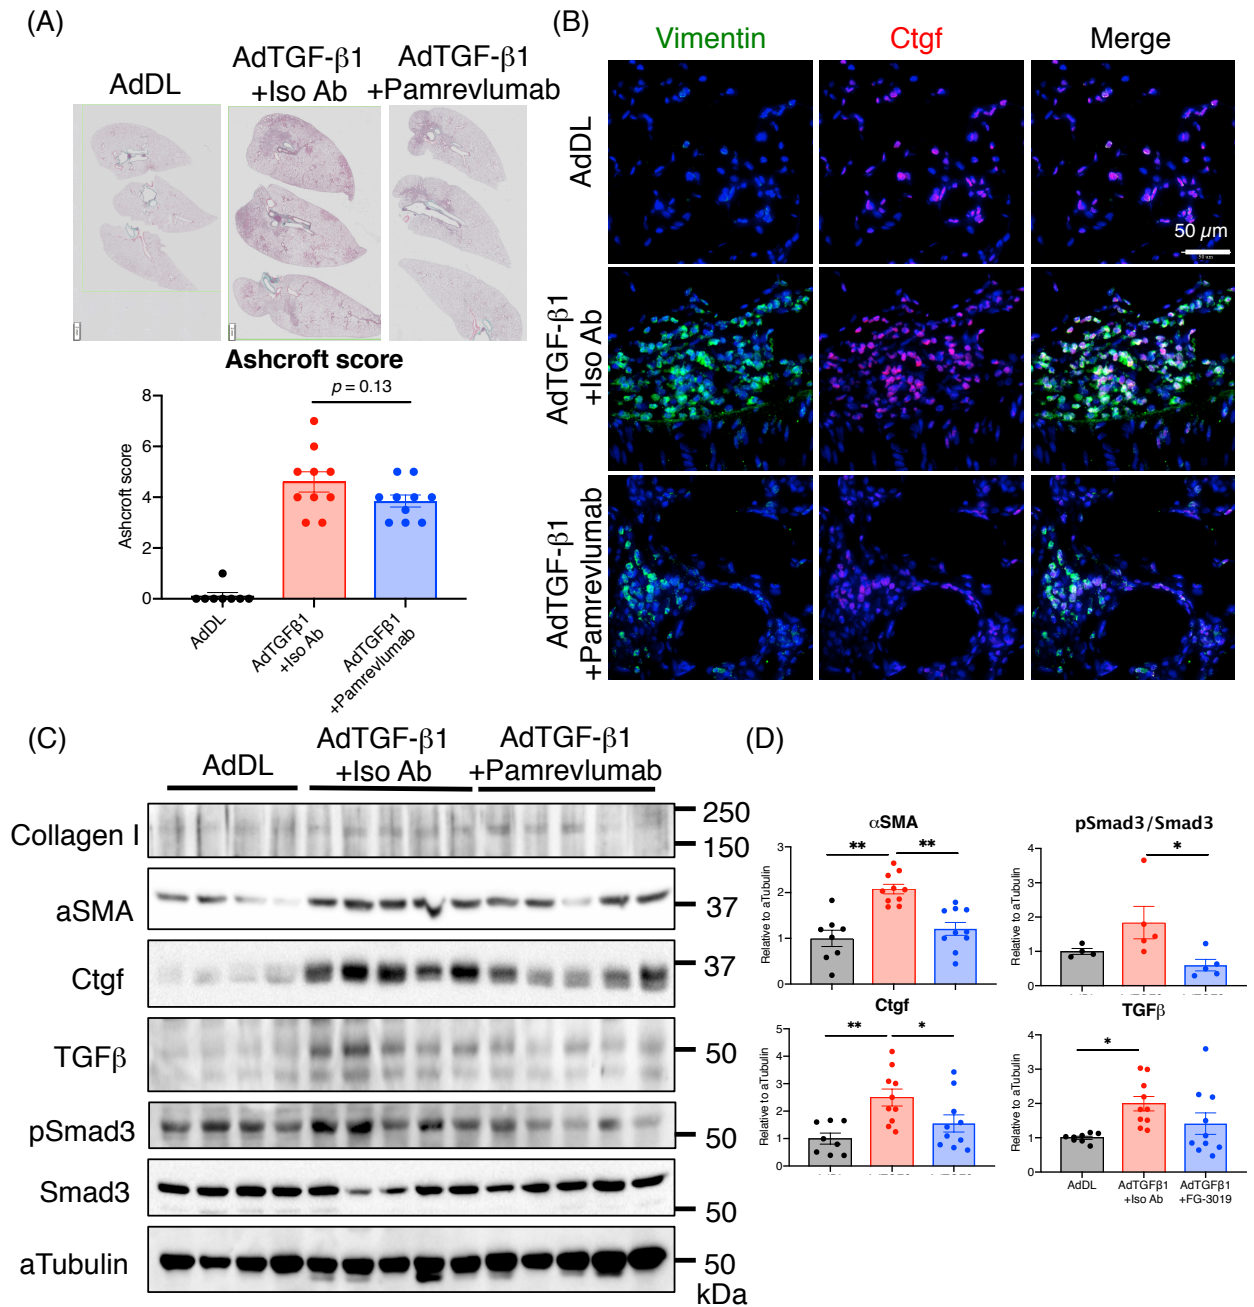

12  
 13  
 14

## 1   **References**

- 2   1.   Hopkins RB, Burke N, Fell C, Dion G, Kolb M. Epidemiology and survival of  
3   idiopathic pulmonary fibrosis from national data in Canada. *Eur Respir J*  
4   2016;48:187–195.
- 5   2.   Raghu G, Chen S-Y, Yeh W-S, Maroni B, Li Q, Lee Y-C, Collard HR. Idiopathic  
6   pulmonary fibrosis in US Medicare beneficiaries aged 65 years and older:  
7   incidence, prevalence, and survival, 2001-11. *Lancet Respir Med* 2014;2:566–72.
- 8   3.   Raghu G, Selman M. Nintedanib and pirfenidone: New antifibrotic treatments  
9   indicated for idiopathic pulmonary fibrosis offer hopes and raises questions. *Am J*  
10   *Respir Crit Care Med* 2015;191:252–254.
- 11   4.   Holbourn KP, Acharya KR, Perbal B. The CCN family of proteins: structure-  
12   function relationships. *Trends Biochem Sci* 2008;33:461–473.
- 13   5.   Ramazani Y, Knops N, Elmonem MA, Nguyen TQ, Arcolino FO, van den  
14   Heuvel L, Levtchenko E, Kuypers D, Goldschmeding R. Connective tissue  
15   growth factor (CTGF) from basics to clinics. *Matrix Biol* 2018;68–69:44–66.
- 16   6.   Brunner AM, Marquardt H, Malacko AR, Lioubin MN, Purchio AF. Site-  
17   directed mutagenesis of cysteine residues in the pro region of the transforming  
18   growth factor beta 1 precursor. Expression and characterization of mutant  
19   proteins. *J Biol Chem* 1989;264:13660–4.
- 20   7.   Sime PJ, Xing Z, Graham FL, Csaky KG, Gauldie J. Adenovector-mediated gene  
21   transfer of active transforming growth factor-beta1 induces prolonged severe  
22   fibrosis in rat lung. *J Clin Invest* 1997;100:768–776.
- 23   8.   Hübner R-H, Gitter W, El Mokhtari NE, Mathiak M, Both M, Bolte H, Freitag-  
24   Wolf S, Bewig B. Standardized quantification of pulmonary fibrosis in  
25   histological samples. *Biotechniques* 2008;44:507–11, 514–7.
- 26   9.   Adams TS, Schupp JC, Poli S, Ayaub EA, Neumark N, Ahangari F, Chu SG,  
27   Raby B, DeLuliis G, Januszyk M, Duan Q, Arnett HA, Siddiqui A, Washko GR,  
28   Homer R, Yan X, Rosas IO, Kaminski N. Single Cell RNA-seq reveals ectopic  
29   and aberrant lung resident cell populations in Idiopathic Pulmonary Fibrosis.  
30   *bioRxiv* 2019;759902.doi:10.1101/759902.
- 31   10.   Igarashi A, Okochi H, Bradham DM, Grotendorst GR. Regulation of connective  
32   tissue growth factor gene expression in human skin fibroblasts and during wound  
33   repair. *Mol Biol Cell* 1993;4:637–45.
- 34   11.   Liu F, Mih JD, Shea BS, Kho AT, Sharif AS, Tager AM, Tschumperlin DJ.  
35   Feedback amplification of fibrosis through matrix stiffening and COX-2  
36   suppression. *J Cell Biol* 2010;190:693–706.
- 37   12.   Burgstaller G, Oehrle B, Gerckens M, White ES, Schiller HB, Eickelberg O. The  
38   instructive extracellular matrix of the lung: basic composition and alterations in  
39   chronic lung disease. *Eur Respir J* 2017;50:1601805.
- 40   13.   Schellenberg A, Jousen S, Moser K, Hampe N, Hersch N, Hemeda H, Schnitker  
41   J, Denecke B, Lin Q, Pallua N, Zenke M, Merkel R, Hoffmann B, Wagner W.  
42   Matrix elasticity, replicative senescence and DNA methylation patterns of  
43   mesenchymal stem cells. *Biomaterials* 2014;35:6351–6358.
- 44   14.   Lipson KE, Wong C, Teng Y, Spong S. CTGF is a central mediator of tissue  
45   remodeling and fibrosis and its inhibition can reverse the process of fibrosis.  
46   *Fibrogenesis Tissue Repair* 2012;5:S24.
- 47   15.   Pan LH, Yamauchi K, Uzuki M, Nakanishi T, Takigawa M, Inoue H, Sawai T.  
48   Type II alveolar epithelial cells and interstitial fibroblasts express connective  
49   tissue growth factor in IPF. *Eur Respir J* 2001;17:1220–1227.
- 50   16.   Fonseca C, Lindahl GE, Ponticos M, Sestini P, Renzoni EA, Holmes AM,  
51   Spagnolo P, Pantelidis P, Leoni P, McHugh N, Stock CJ, Shi-Wen X, Denton CP,



- 1 Black CM, Welsh KI, du Bois RM, Abraham DJ. A polymorphism in the CTGF  
2 promoter region associated with systemic sclerosis. *N Engl J Med*  
3 2007;357:1210–20.
- 4 17. Pi L, Fu C, Lu Y, Zhou J, Jorgensen M, Shenoy V, Lipson KE, Scott EW, Bryant  
5 AJ. Vascular endothelial cell-specific connective tissue growth factor (CTGF) is  
6 necessary for development of chronic hypoxia-induced pulmonary hypertension.  
7 *Front Physiol* 2018;9:1–13.
- 8 18. Pi L, Xia H, Liu J, Shenoy AK, Hauswirth WW, Scott EW. Role of connective  
9 tissue growth factor in the retinal vasculature during development and ischemia.  
10 *Invest Ophthalmol Vis Sci* 2011;52:8701–10.
- 11 19. Higgins DF, Biju MP, Akai Y, Wutz A, Johnson RS, Haase VH. Hypoxic  
12 induction of Ctgf is directly mediated by Hif-1. *Am J Physiol Renal Physiol*  
13 2004;287:F1223–32.
- 14 20. Fuchshofer R, Yu AL, Teng H-H, Strauss R, Kampik A, Welge-Lussen U.  
15 Hypoxia/reoxygenation induces CTGF and PAI-1 in cultured human retinal  
16 pigment epithelium cells. *Exp Eye Res* 2009;88:889–99.
- 17 21. Kono M, Nakamura Y, Suda T, Kato M, Kaida Y, Hashimoto D, Inui N, Hamada  
18 E, Miyazaki O, Kurashita S, Fukamachi I, Endo K, Ng PS, Takehara K,  
19 Nakamura H, Maekawa M, Chida K. Plasma CCN2 (connective tissue growth  
20 factor; CTGF) is a potential biomarker in idiopathic pulmonary fibrosis (IPF).  
21 *Clin Chim Acta* 2011;412:2211–2215.
- 22 22. Frazier K, Williams S, Kothapalli D, Klapper H, Grotendorst GR. Stimulation of  
23 fibroblast cell growth, matrix production, and granulation tissue formation by  
24 connective tissue growth factor. *J Invest Dermatol* 1996;107:404–11.
- 25 23. Nakanishi T, Kimura Y, Tamura T, Ichikawa H, Yamaai Y, Sugimoto T,  
26 Takigawa M. Cloning of a mRNA preferentially expressed in chondrocytes by  
27 differential display-PCR from a human chondrocytic cell line that is identical  
28 with connective tissue growth factor (CTGF) mRNA. *Biochem Biophys Res*  
29 *Commun* 1997;234:206–10.
- 30 24. Grotendorst GR. Connective tissue growth factor: a mediator of TGF-beta action  
31 on fibroblasts. *Cytokine Growth Factor Rev* 1997;8:171–9.
- 32 25. Noguchi S, Saito A, Mikami Y, Urushiyama H, Horie M, Matsuzaki H,  
33 Takeshima H, Makita K, Miyashita N, Mitani A, Jo T, Yamauchi Y, Terasaki Y,  
34 Nagase T. TAZ contributes to pulmonary fibrosis by activating profibrotic  
35 functions of lung fibroblasts. *Sci Rep* 2017;7:1–11.
- 36 26. Abreu JG, Ketpura NI, Reversade B, De Robertis EM. Connective-tissue growth  
37 factor (ctgf) modulates cell signalling by bmp and TGF- $\beta$ . *Nat Cell Biol*  
38 2002;4:599–604.
- 39 27. Bonniaud P, Martin G, Margetts PJ, Ask K, Robertson J, Gauldie J, Kolb M.  
40 Connective tissue growth factor is crucial to inducing a profibrotic environment  
41 in “fibrosis-resistant” Balb/c mouse lungs. *Am J Respir Cell Mol Biol*  
42 2004;31:510–516.
- 43 28. Nakerakanti SS, Bujor AM, Trojanowska M. CCN2 is required for the TGF- $\beta$   
44 induced activation of Smad1-Erk1/2 signaling network. *PLoS One*  
45 2011;6:e21911.
- 46 29. Richeldi L, Fernández Pérez ER, Costabel U, Albera C, Lederer DJ, Flaherty KR,  
47 Ettinger N, Perez R, Scholand MB, Goldin J, Peony Yu K-H, Neff T, Porter S,  
48 Zhong M, Gorina E, Kouchakji E, Raghu G. Pamrevlumab, an anti-connective  
49 tissue growth factor therapy, for idiopathic pulmonary fibrosis (PRAISE): a  
50 phase 2, randomised, double-blind, placebo-controlled trial. *Lancet Respir Med*  
51 2019;2600:1–9.

- 1 30. Bickelhaupt S, Erbel C, Timke C, Wirkner U, Dadrich M, Flechsig P, Tietz A,  
2 Pföhler J, Gross W, Peschke P, Hoeltgen L, Katus HA, Gröne HJ, Nicolay NH,  
3 Saffrich R, Debus J, Sternlicht MD, Seeley TW, Lipson KE, Huber PE. Effects  
4 of CTGF Blockade on Attenuation and Reversal of Radiation-Induced  
5 Pulmonary Fibrosis. *J Natl Cancer Inst* 2017;109:1–11.
- 6 31. Sternlicht MD, Wirkner U, Bickelhaupt S, Lopez Perez R, Tietz A, Lipson KE,  
7 Seeley TW, Huber PE. Radiation-induced pulmonary gene expression changes  
8 are attenuated by the CTGF antibody Pamrevlumab. *Respir Res* 2018;19:1–16.
- 9 32. Mori Y, Chen SJ, Varga J. Expression and regulation of intracellular SMAD  
10 signaling in scleroderma skin fibroblasts. *Arthritis Rheum* 2003;48:1964–1978.
- 11 33. Bogatkevich GS, Ludwicka-Bradley A, Singleton CB, Bethard JR, Silver RM.  
12 Proteomic analysis of CTGF-activated lung fibroblasts: Identification of IQGAP1  
13 as a key player in lung fibroblast migration. *Am J Physiol - Lung Cell Mol*  
14 *Physiol* 2008;295:603–611.
- 15 34. Allen JT, Knight RA, Bloor CA, Spiteri MA. Enhanced insulin-like growth  
16 factor binding protein-related protein 2 (connective tissue growth factor)  
17 expression in patients with idiopathic pulmonary fibrosis and pulmonary  
18 sarcoidosis. *Am J Respir Cell Mol Biol* 1999;21:693–700.
- 19

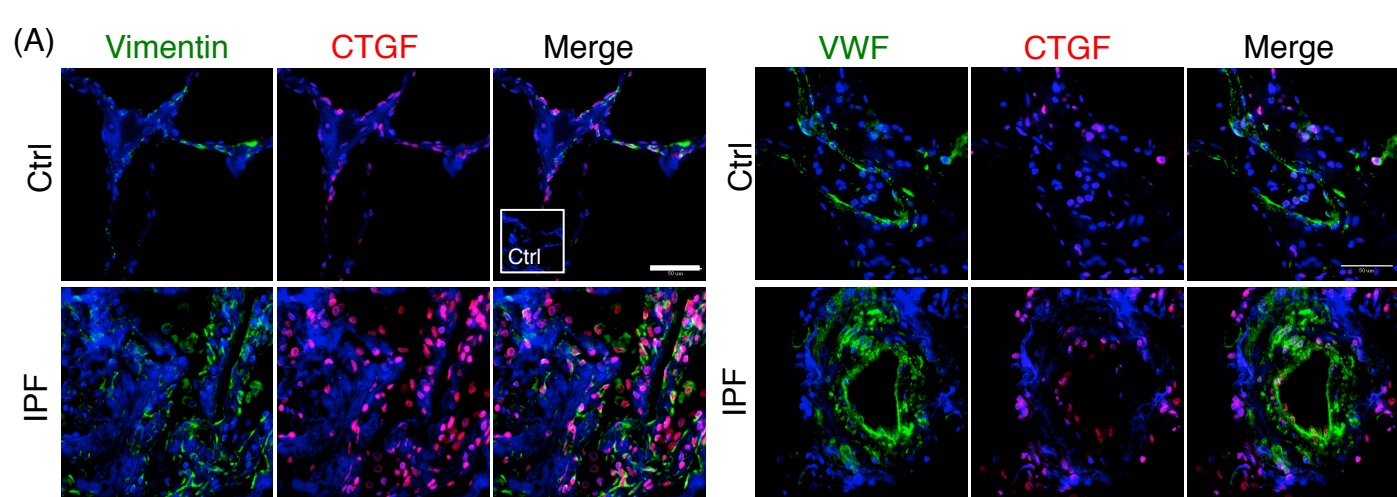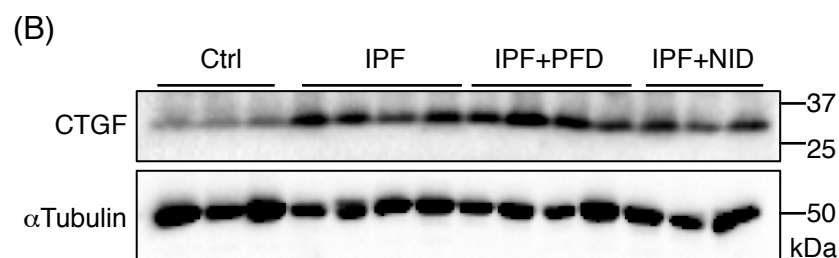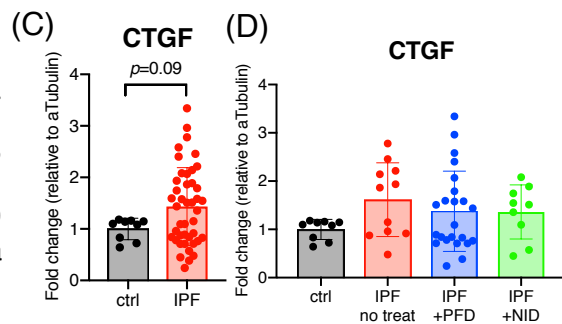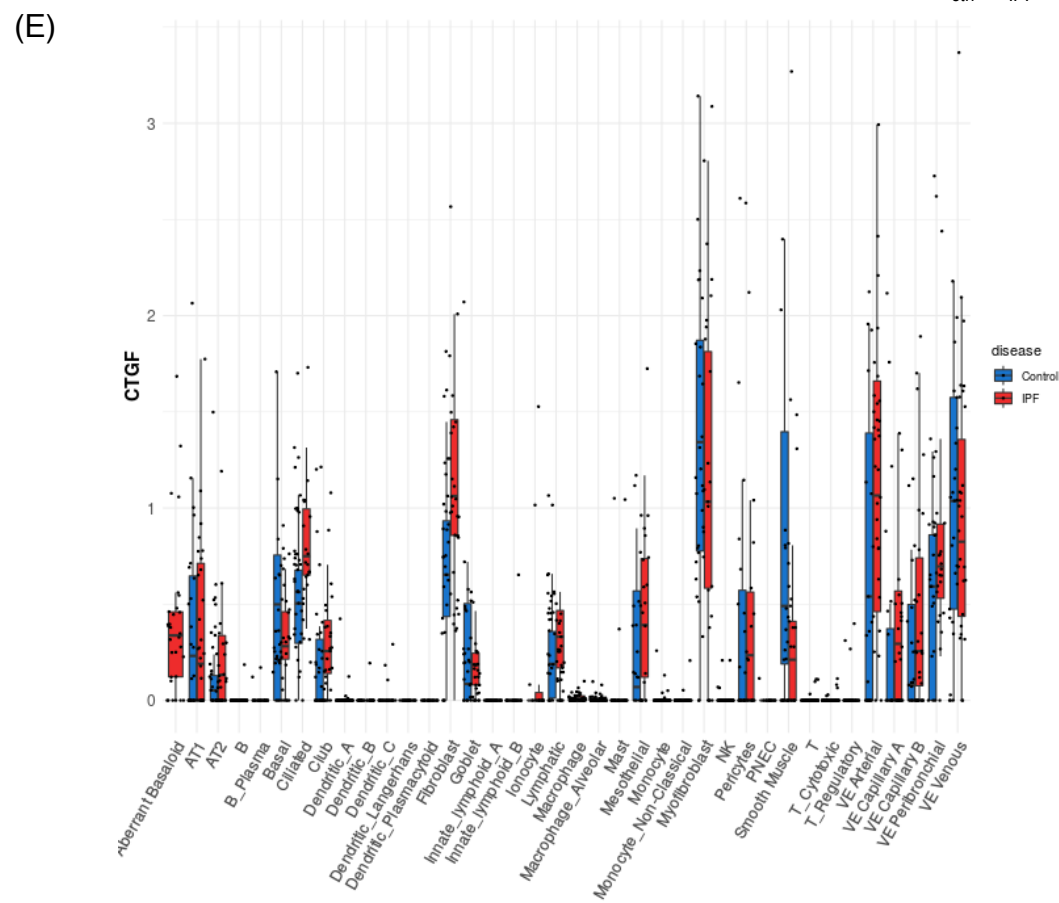

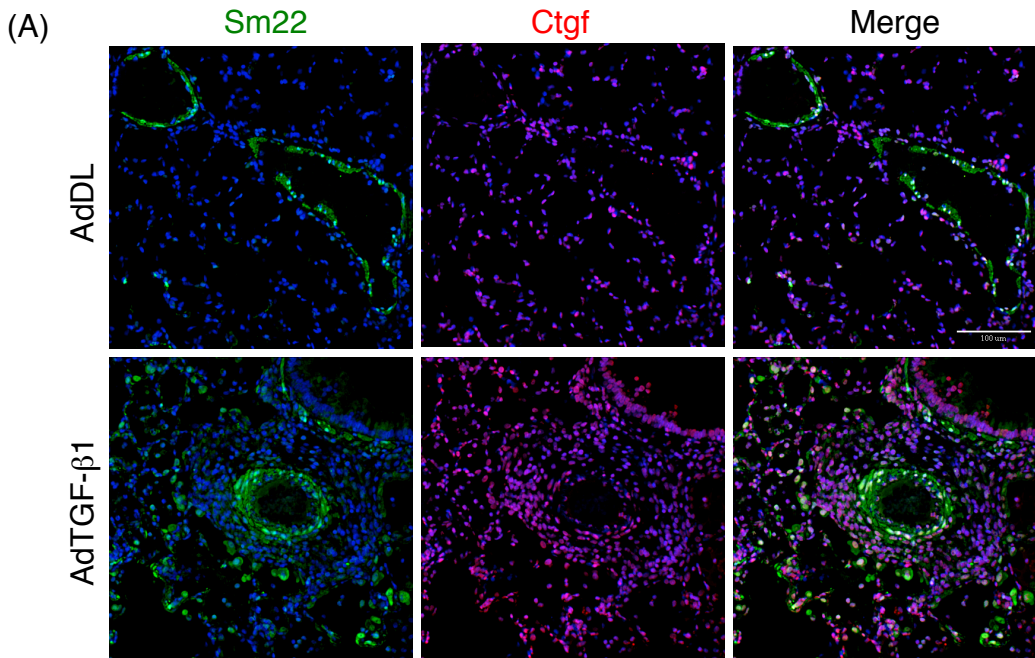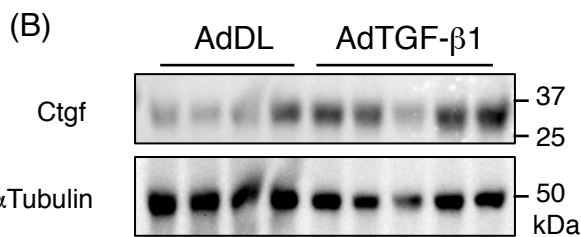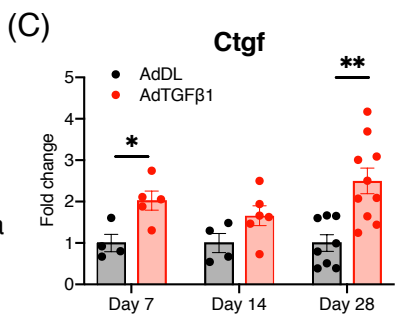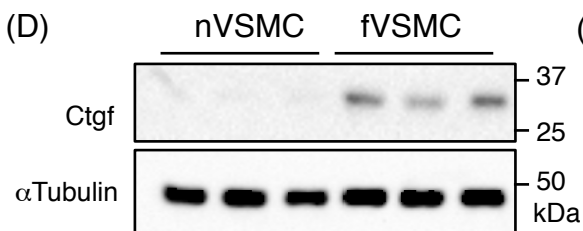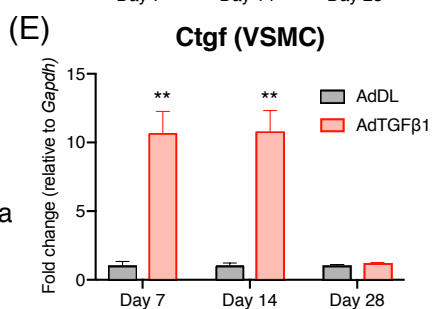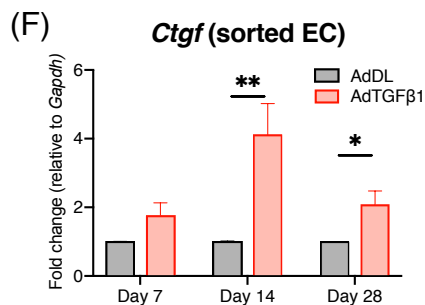

(A)

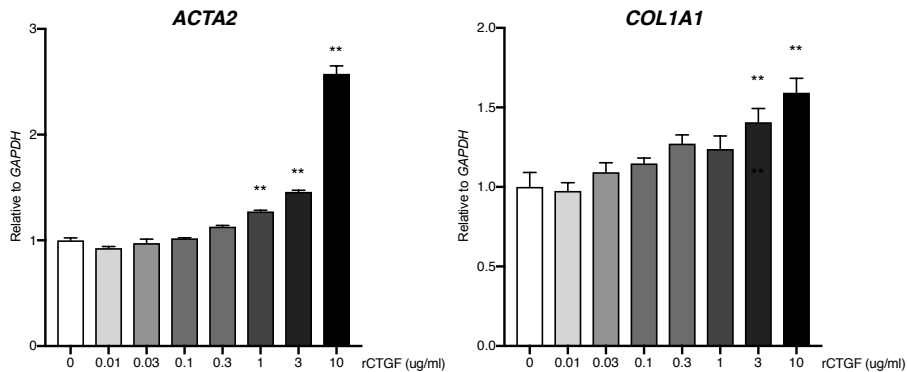

(B)

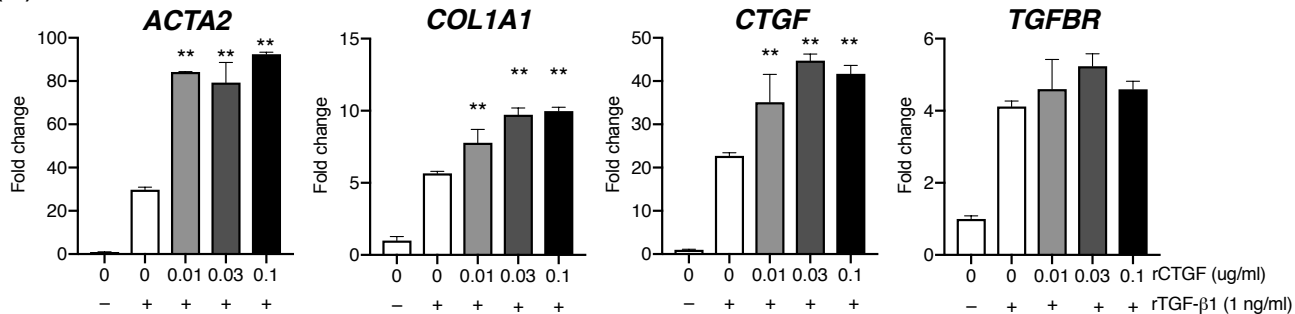

(A)

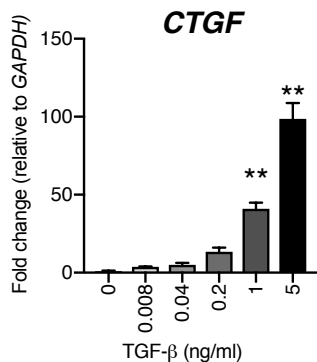

(B)

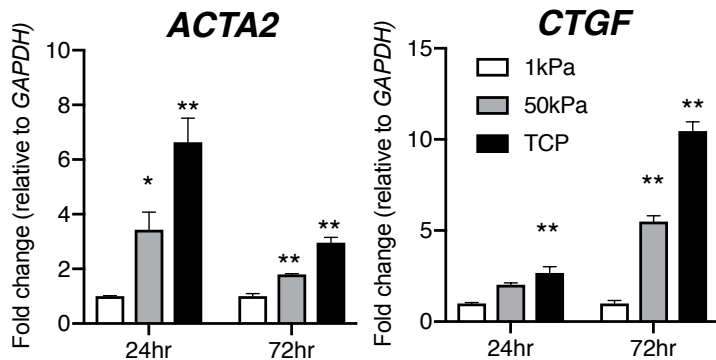

(C)

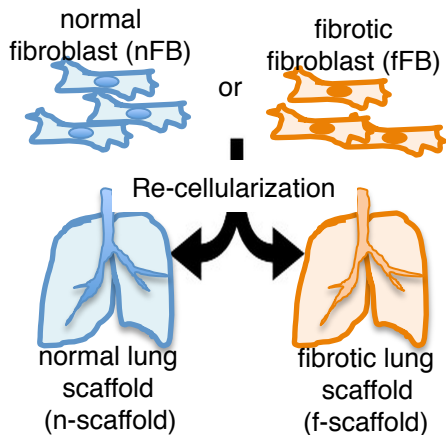

(D)

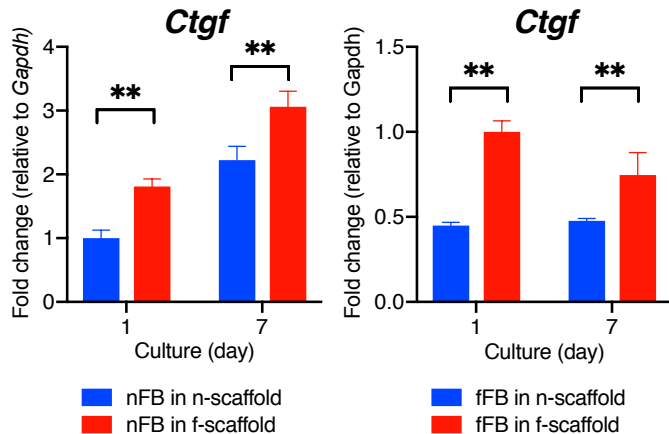

(A)

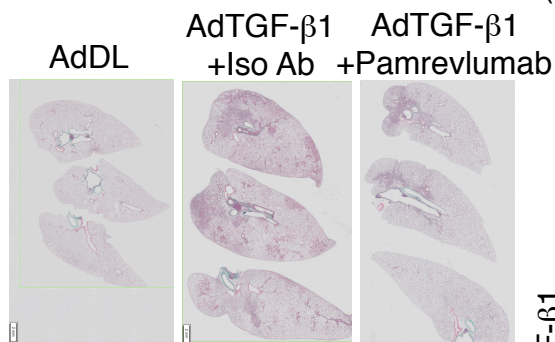

Ashcroft score

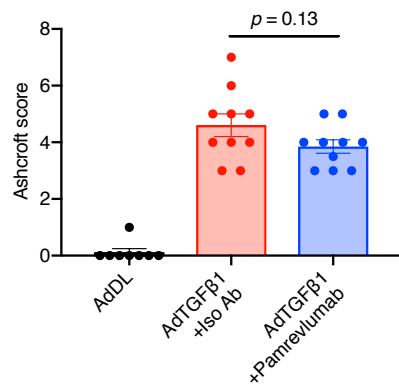

(B)

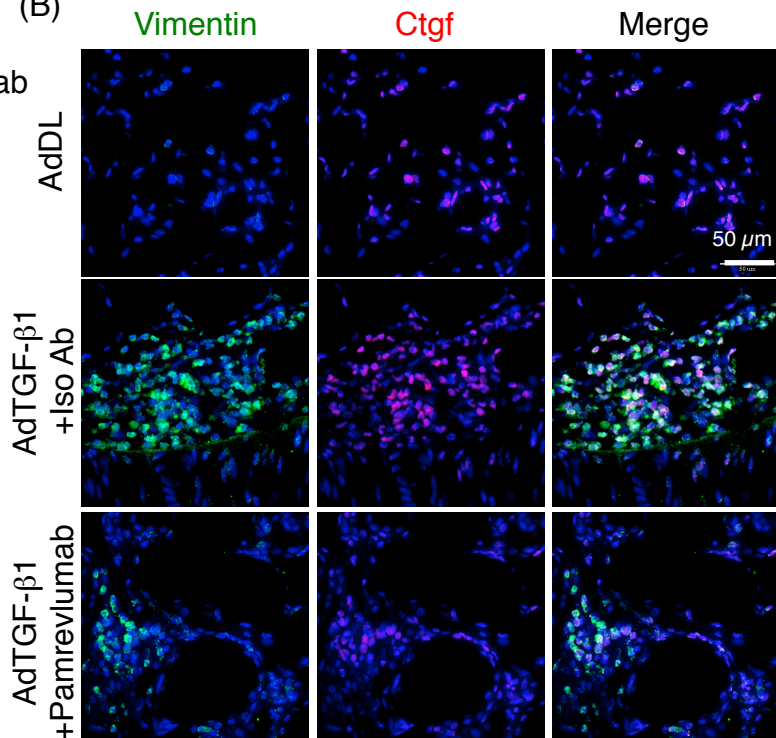

(C)

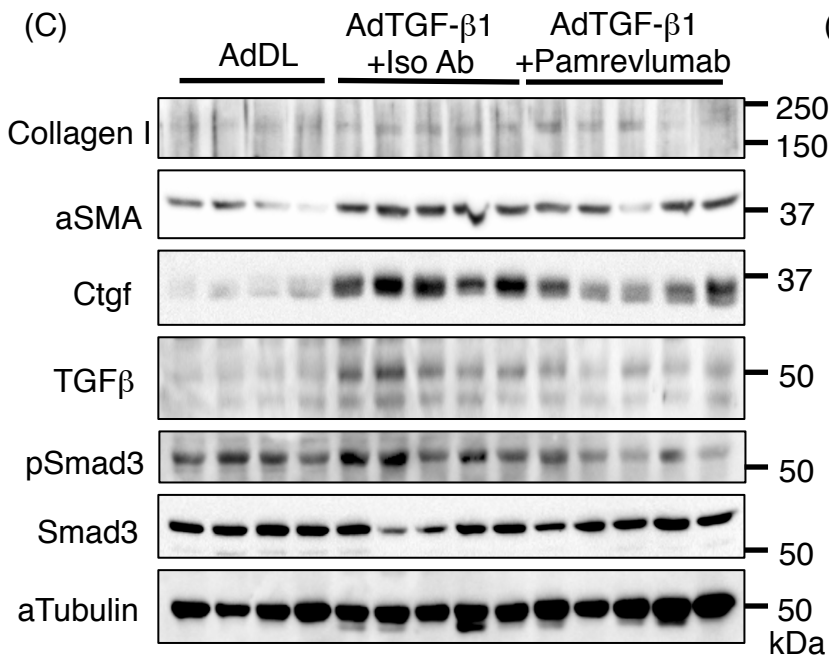

(D)

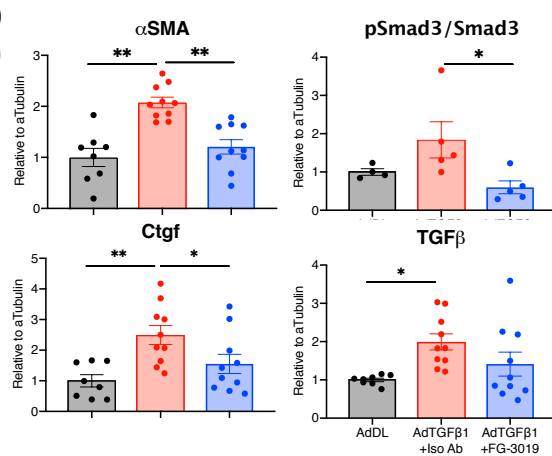

Source: https://www.biorxiv.org/content/10.1101/2020.07.04.187492v1.full.pdf
